# Supplementary material for: A comprehensive dataset on cytotoxicity of ionic liquids
Source: PubMed Central journal article supplement — Sci Data. 2024 Dec 18;11:1379. doi: 10.1038/s41597-024-04190-3 (PMC11655836; doi:10.1038/s41597-024-04190-3), 2024-12-18
Supplement: 41597_2024_4190_MOESM1_ESM.pdf [file 41597_2024_4190_MOESM1_ESM.pdf]

# A comprehensive dataset on cytotoxicity of ionic liquids

Liana A. Arakelyan<sup>1</sup>, Daria M. Arkhipova<sup>1</sup>, Marina M. Seitkalieva<sup>1</sup>, Anna V. Vavina<sup>1</sup>, Liliya T. Sahharova<sup>1</sup>,  
Saniyat K. Kurbanalieva<sup>1</sup>, Alexandra V. Posvyatenko<sup>1,2</sup>, Ksenia S. Egorova<sup>1</sup>, Valentine P. Ananikov<sup>1</sup>

<sup>1</sup> Zelinsky Institute of Organic Chemistry, Russian Academy of Sciences, Leninsky Prospekt 47, Moscow  
119991, Russia

<sup>2</sup> Dmitry Rogachev National Medical Research Center of Pediatric Hematology, Oncology and Immunology,  
Ministry of Health of Russian Federation, Moscow 117198, Russia

Corresponding author(s): Valentine P. Ananikov (val@ioc.ac.ru), Ksenia S. Egorova (egorova-ks@ioc.ac.ru)

## Supporting Information

### Contents

|                                                                                                                                              |   |
|----------------------------------------------------------------------------------------------------------------------------------------------|---|
| Table S1. Diversity of unique structures, cations, anions, cell lines and methods in the dataset and four most populated groups of ILs ..... | 2 |
| Table S2. Diversity of unique structures, cations, anions, cell lines and methods in all other groups of ILs .....                           | 3 |
| Table S3. Most popular cell lines and measurement methods for all groups of ILs and imidazolium ILs in particular.....                       | 4 |

**Table S1.** Diversity of unique structures, cations, anions, cell lines and methods in the dataset and four most populated groups of ILs<sup>a</sup>

|                   | <b>All ILs</b> | <b>Imidazolium ILs</b> | <b>Phosphonium ILs</b> | <b>Polycharged ILs</b> | <b>Ammonium ILs</b> |
|-------------------|----------------|------------------------|------------------------|------------------------|---------------------|
| Total count of IL | 3837           | 1366 (36%)             | 572 (15%)              | 478 (12%)              | 312 (8%)            |
| Unique structures | 1227           | 314                    | 98                     | 184                    | 127                 |
| Unique cations    | 657            | 130                    | 66                     | 94                     | 67                  |
| Unique anions     | 156            | 63                     | 21                     | 51                     | 36                  |
| Cell lines        | 155            | 104                    | 104                    | 27                     | 93                  |
| Methods           | 24             | 13                     | 11                     | 7                      | 11                  |

<sup>a</sup> Percentage of the total count is shown in parentheses.

**Table S2.** Diversity of unique structures, cations, anions, cell lines and methods in all other groups of ILs<sup>a</sup>

|                    | All  | Pyridinium | Benzimidazolium | Cholinium | Guanidinium | Thiazolium | Pyrrolidinium | Piperazinium | Morpholinium | Piperidinium | Quinolinium | Triazolium | Pyrimidinium | Other    |
|--------------------|------|------------|-----------------|-----------|-------------|------------|---------------|--------------|--------------|--------------|-------------|------------|--------------|----------|
| Total count of ILs | 3837 | 255 (6%)   | 229 (5%)        | 131 (3%)  | 73 (2%)     | 64 (1%)    | 59 (1%)       | 36 (<1%)     | 36 (<1%)     | 35 (<1%)     | 34 (<1%)    | 21(<1%)    | 8 (<1%)      | 128 (3%) |
| Unique structures  | 1227 | 136        | 51              | 65        | 43          | 26         | 32            | 12           | 36           | 25           | 13          | 12         | 3            | 56       |
| Unique cations     | 657  | 85         | 45              | 20        | 36          | 14         | 14            | 8            | 12           | 13           | 11          | 10         | 1            | 43       |
| Unique anions      | 156  | 17         | 5               | 38        | 11          | 6          | 8             | 5            | 20           | 7            | 3           | 5          | 3            | 20       |
| Cell lines         | 155  | 43         | 13              | 35        | 13          | 7          | 16            | 2            | 2            | 6            | 8           | 7          | 3            | 23       |
| Methods            | 24   | 10         | 3               | 11        | 3           | 2          | 5             | 1            | 2            | 3            | 2           | 4          | 1            | 8        |

<sup>a</sup> Percentage of the total count is shown in parentheses.

**Table S3.** Most popular cell lines and measurement methods for all groups of ILs and imidazolium ILs in particular

| Cell name | Cell type (tissue)/disease                          | Count of entries for all groups of ILs | Count of entries for imidazolium ILs | Assays for all groups of ILs               | Assays for imidazolium ILs      |
|-----------|-----------------------------------------------------|----------------------------------------|--------------------------------------|--------------------------------------------|---------------------------------|
| IPC-81    | Bone marrow/Leukemia                                | 308                                    | 141                                  | WST-1                                      | WST-1                           |
| MCF-7     | Epithelial cells (mammary gland)/Adenocarcinoma     | 273                                    | 74                                   | MTT<br>MTS<br>SRB<br>HCT/MTT               | MTT<br>MTS<br>SRB               |
| A549/ATCC | Epithelial cells (lung)/Carcinoma                   | 201                                    | 63                                   | Prestoblue<br>MTT<br>MTS<br>SRB<br>WST-8   | PrestoBlue<br>MTT<br>MTS<br>SRB |
| HeLa      | Epithelial cells (cervix)/Adenocarcinoma            | 180                                    | 72                                   | WST-1<br>MTT<br>MTS                        | WST-1<br>MTT                    |
| CaCo-2    | Epithelial cells (colon)/Colorectal adenocarcinoma  | 174                                    | 110                                  | MTT<br>MTS<br>WST-1                        | MTT<br>MTS                      |
| T-47D     | Epithelial cells (mammary gland)/Carcinoma (ductal) | 93                                     | 34                                   | MTT<br>SRB                                 | MTT<br>SRB                      |
| HaCat     | Keratinocytes (skin)                                | 93                                     | 20                                   | MTT<br>MTS<br>WST-1<br>WST-8<br>AlamarBlue | MTT<br>MTS<br>AlamarBlue        |
